# Supplementary material for: Exogenous growth factors bFGF, EGF and HGF do not influence viability and phenotype of V600EBRAF melanoma cells and their response to vemurafenib and trametinib in vitro
Source: PubMed Central journal article supplement (PMC5568748; doi:10.1371/journal.pone.0183498), 2017-08-22

EGF/  
bFGF      EGF/  
HGF      HGF/  
bFGF

control    PLX10    TRA50    control    PLX10    TRA50    control    PLX10    TRA50

bFGF      EGF      HGF

control    PLX10    TRA50    control    PLX10    TRA50    control    PLX10    TRA50

DMBC11

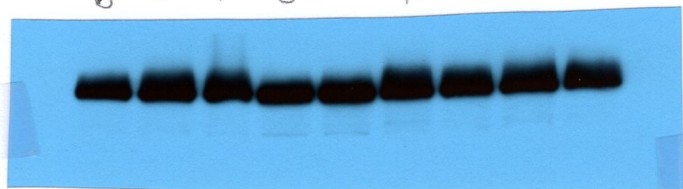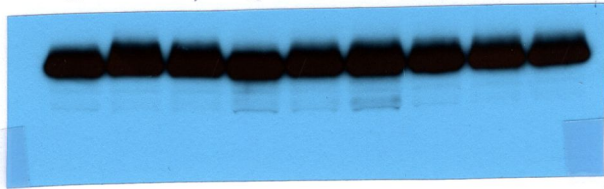

PARP

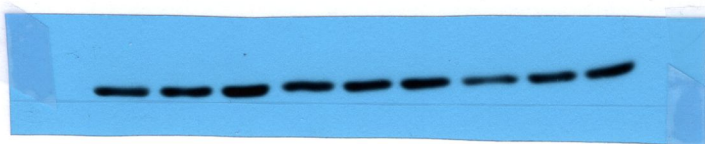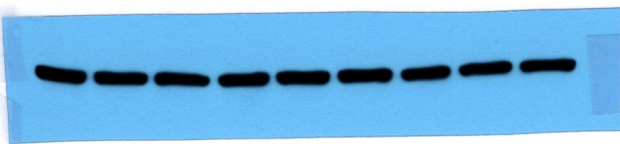

β-actin

DMBC12

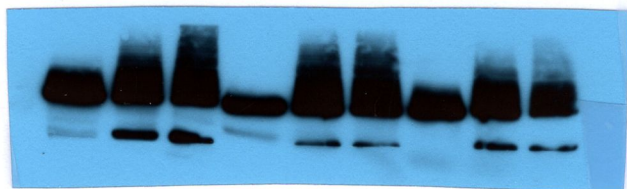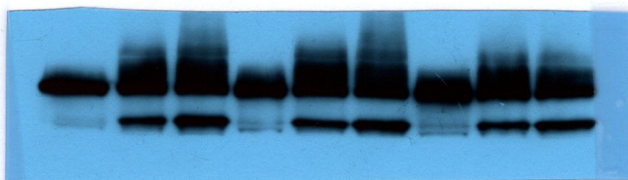

PARP

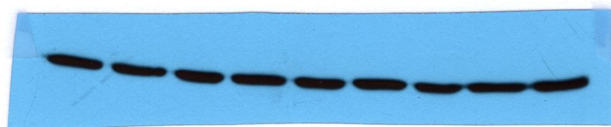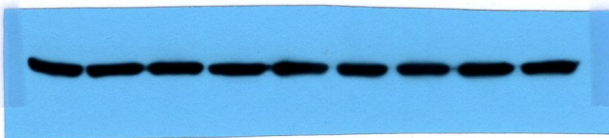

β-actin

DMBC21

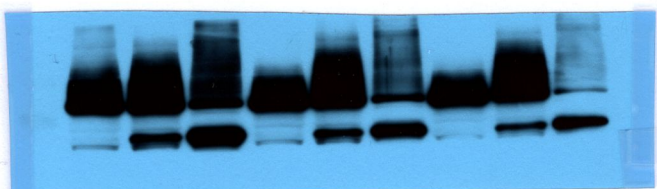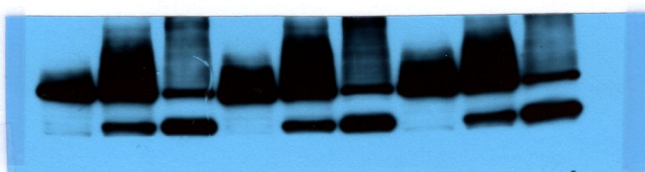

PARP

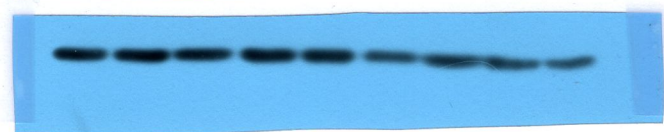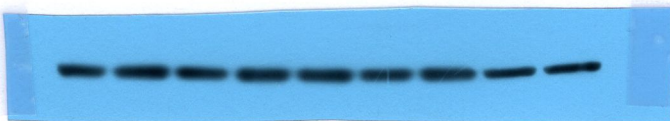

β-actin

DMBC33

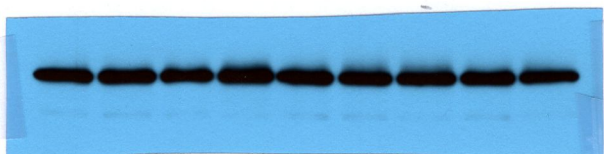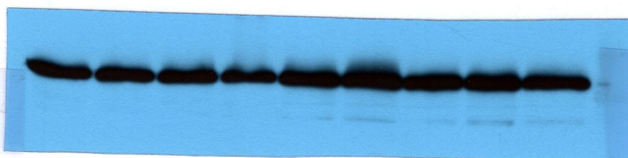

PARP

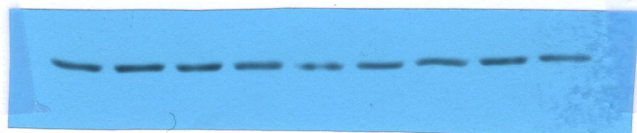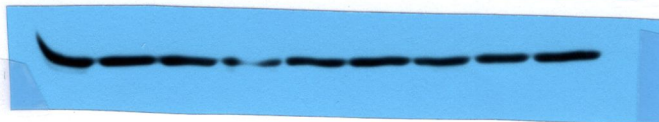

β-actin

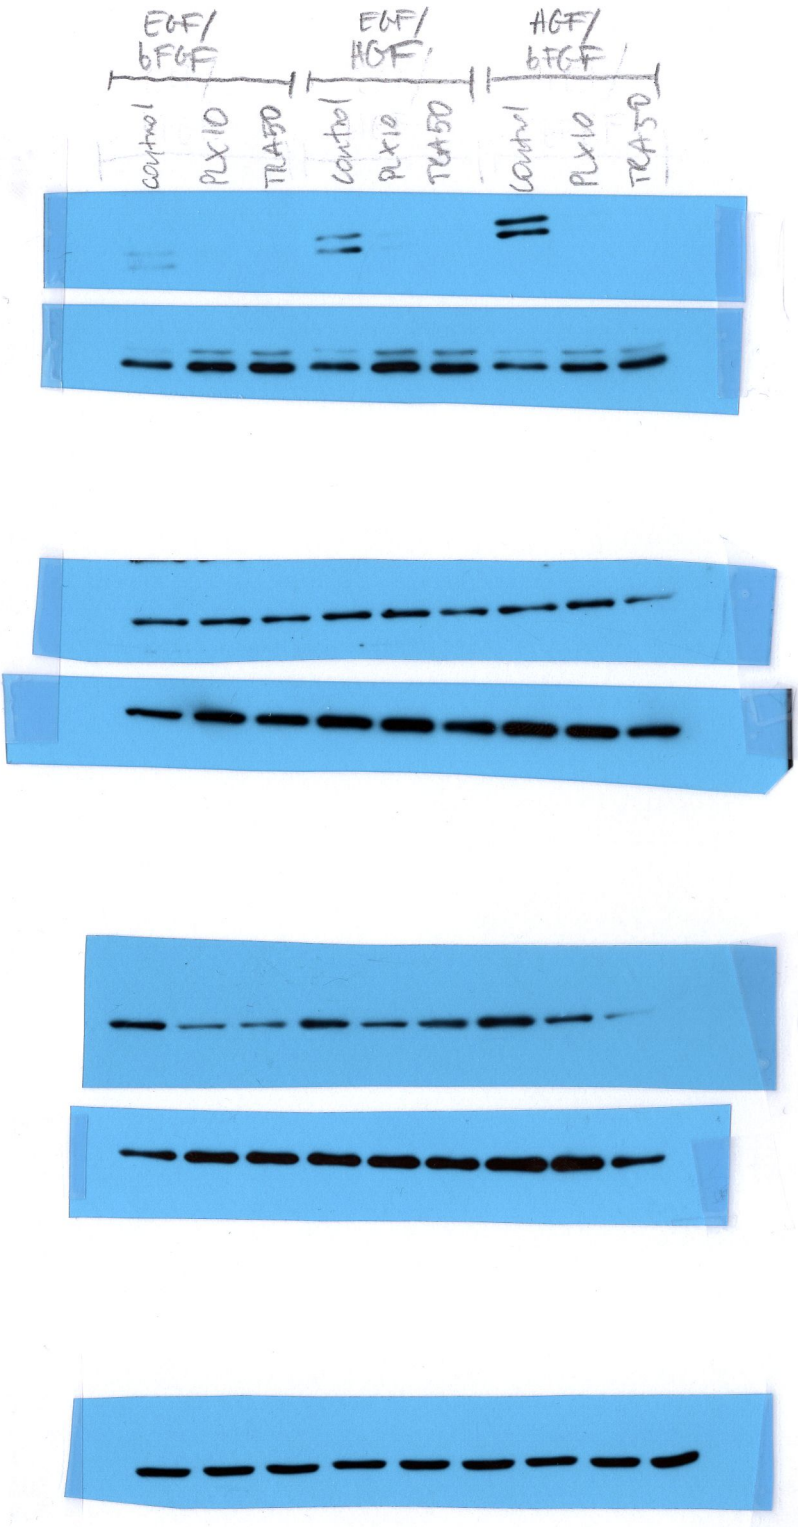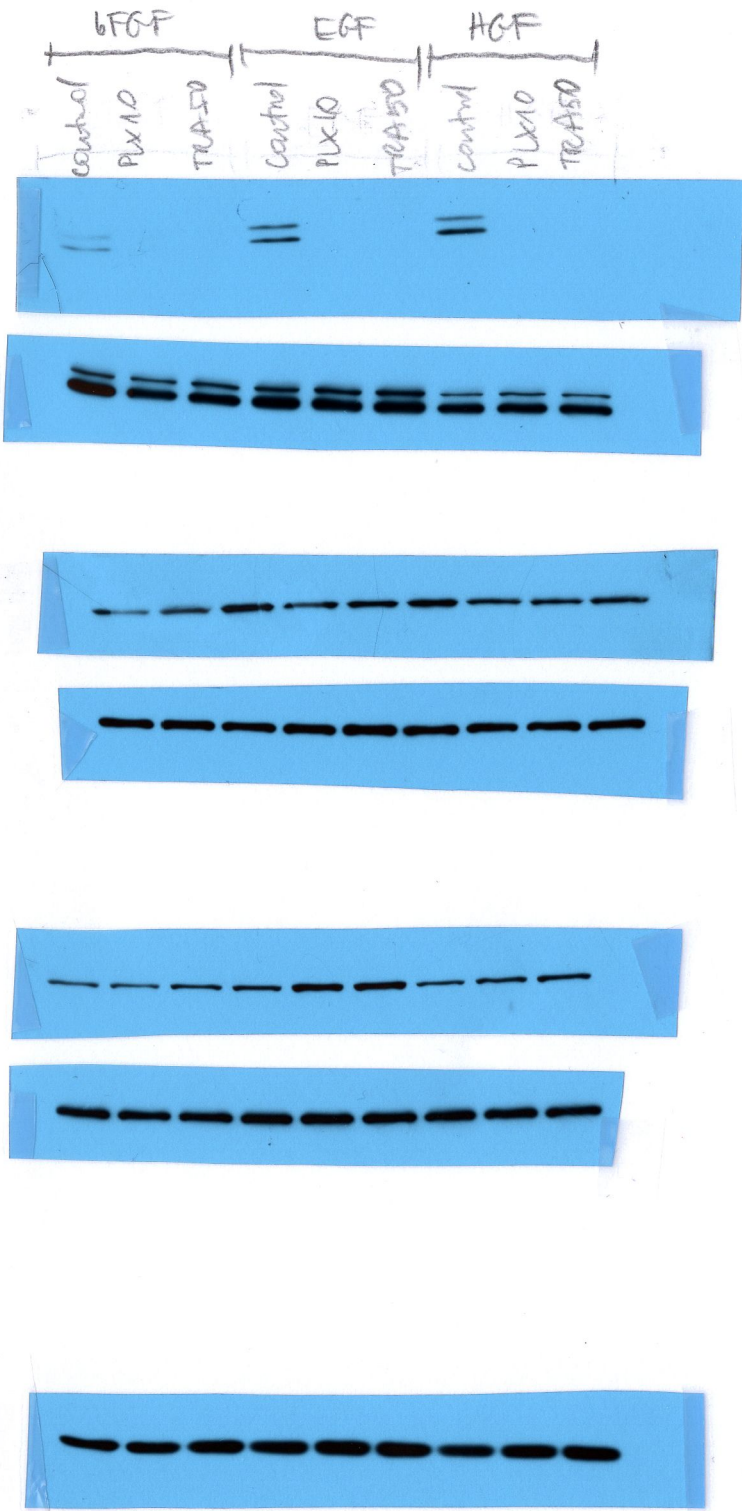

p-Erk1/2

Erk

active  
 $\beta$ -catenin

total  $\beta$ -catenin

p-p65

p65

$\beta$ -actin

DMSC21

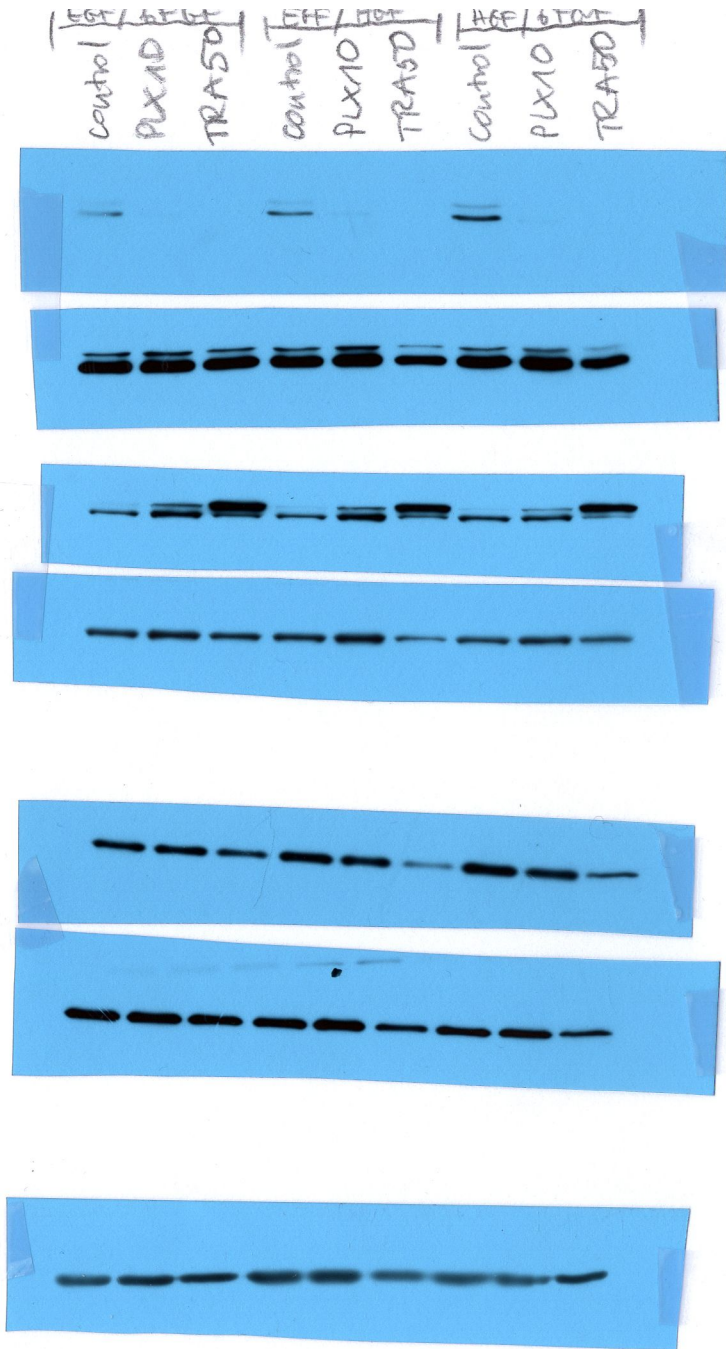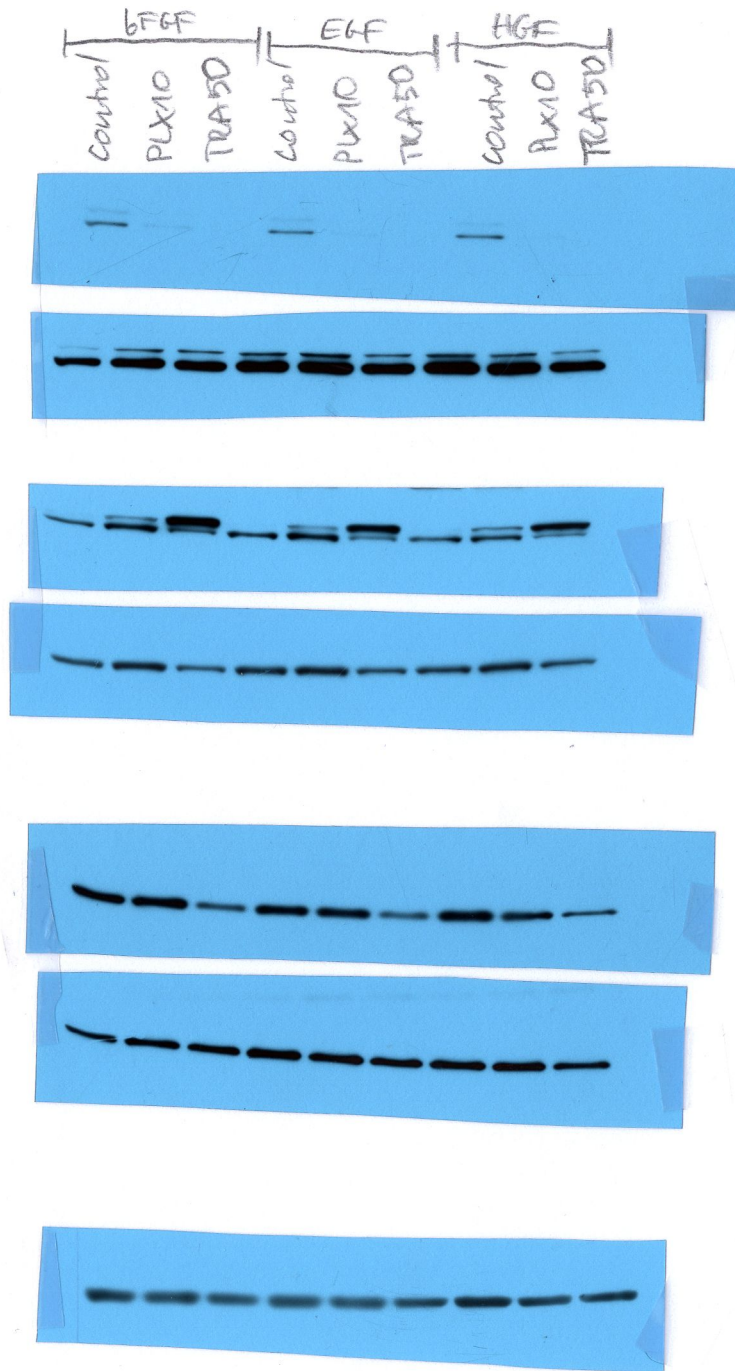

p-Erk1/2

Erk1/2

active  $\beta$ -catenin

total  $\beta$ -catenin

p-p65

p65

$\beta$ -actin

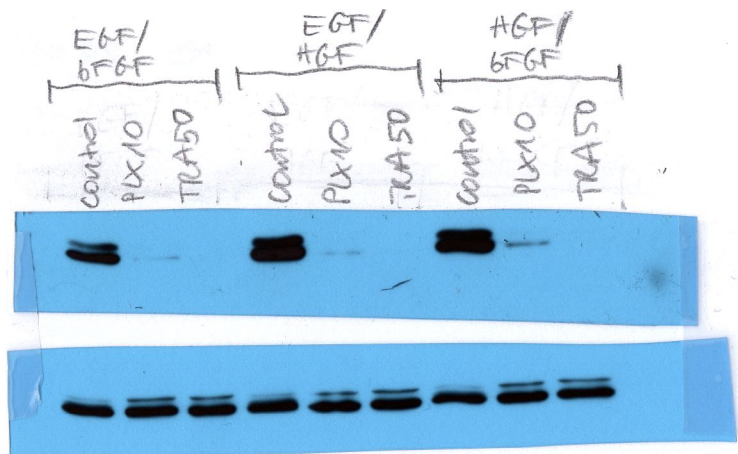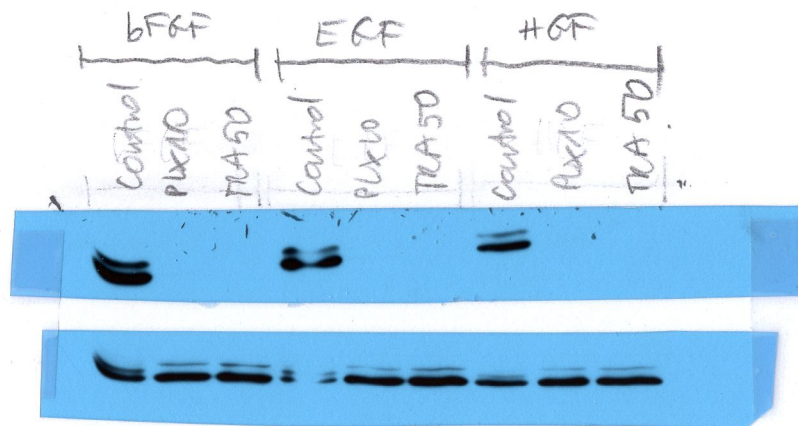

p-Erk1/2  
Erk1/2

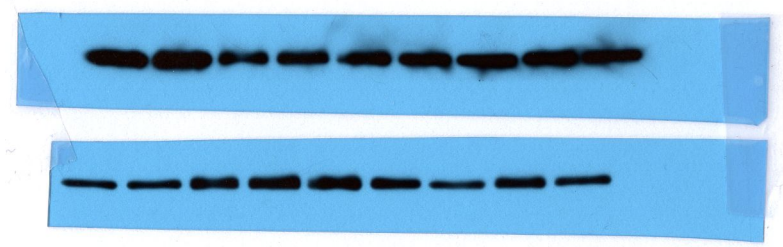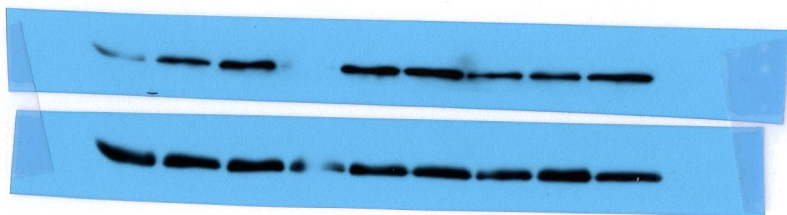

active  
β-catenin  
total  
β-catenin

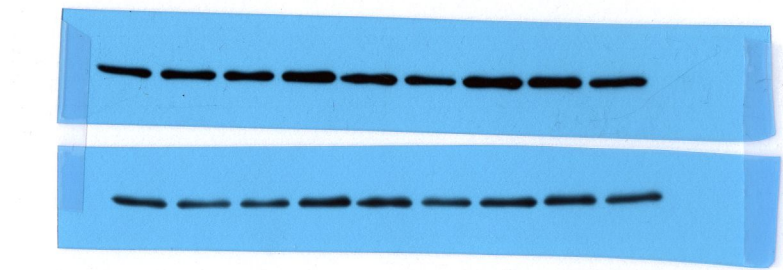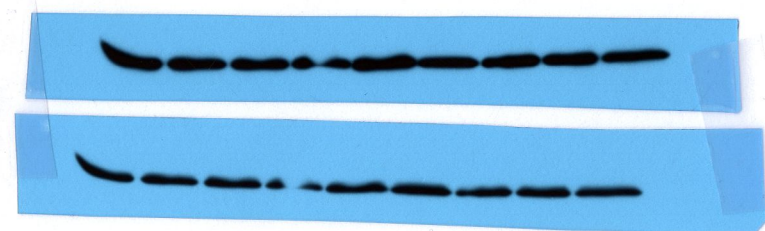

p-p65  
p65

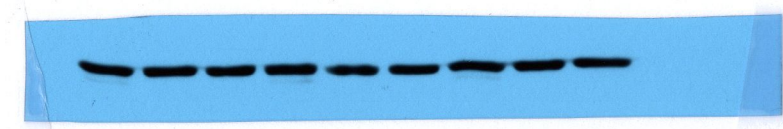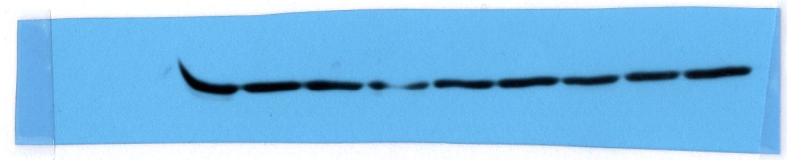

β-actin

DMBC11-21

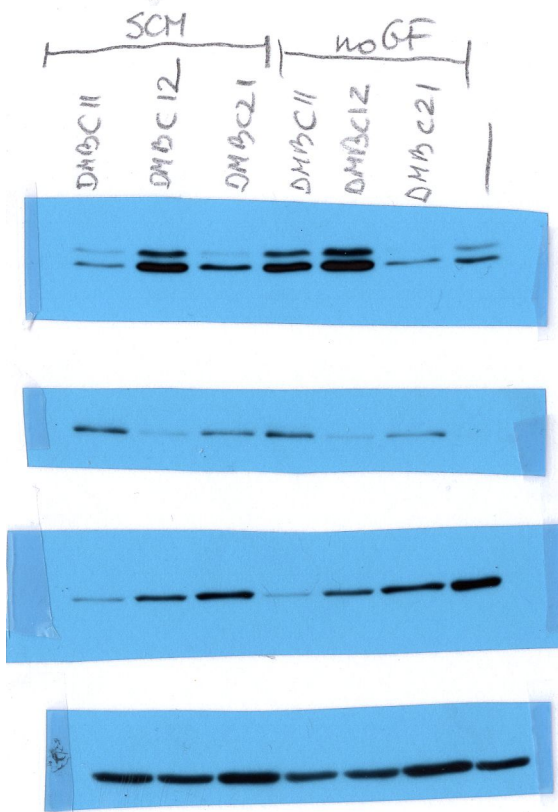

p-Erk<sup>1/2</sup>

active β-catenin

p-p65

β-actin

DMBC28-33

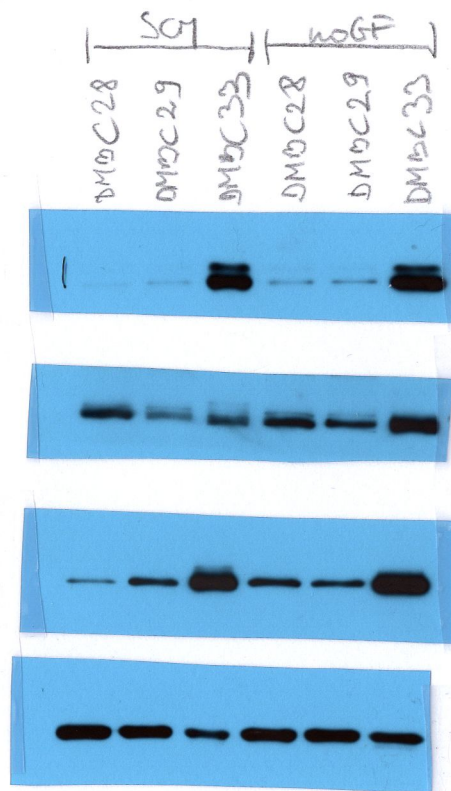

SCH noGF  
DMBC28 DMBC29 DMBC33 DMBC28 DMBC29 DMBC33

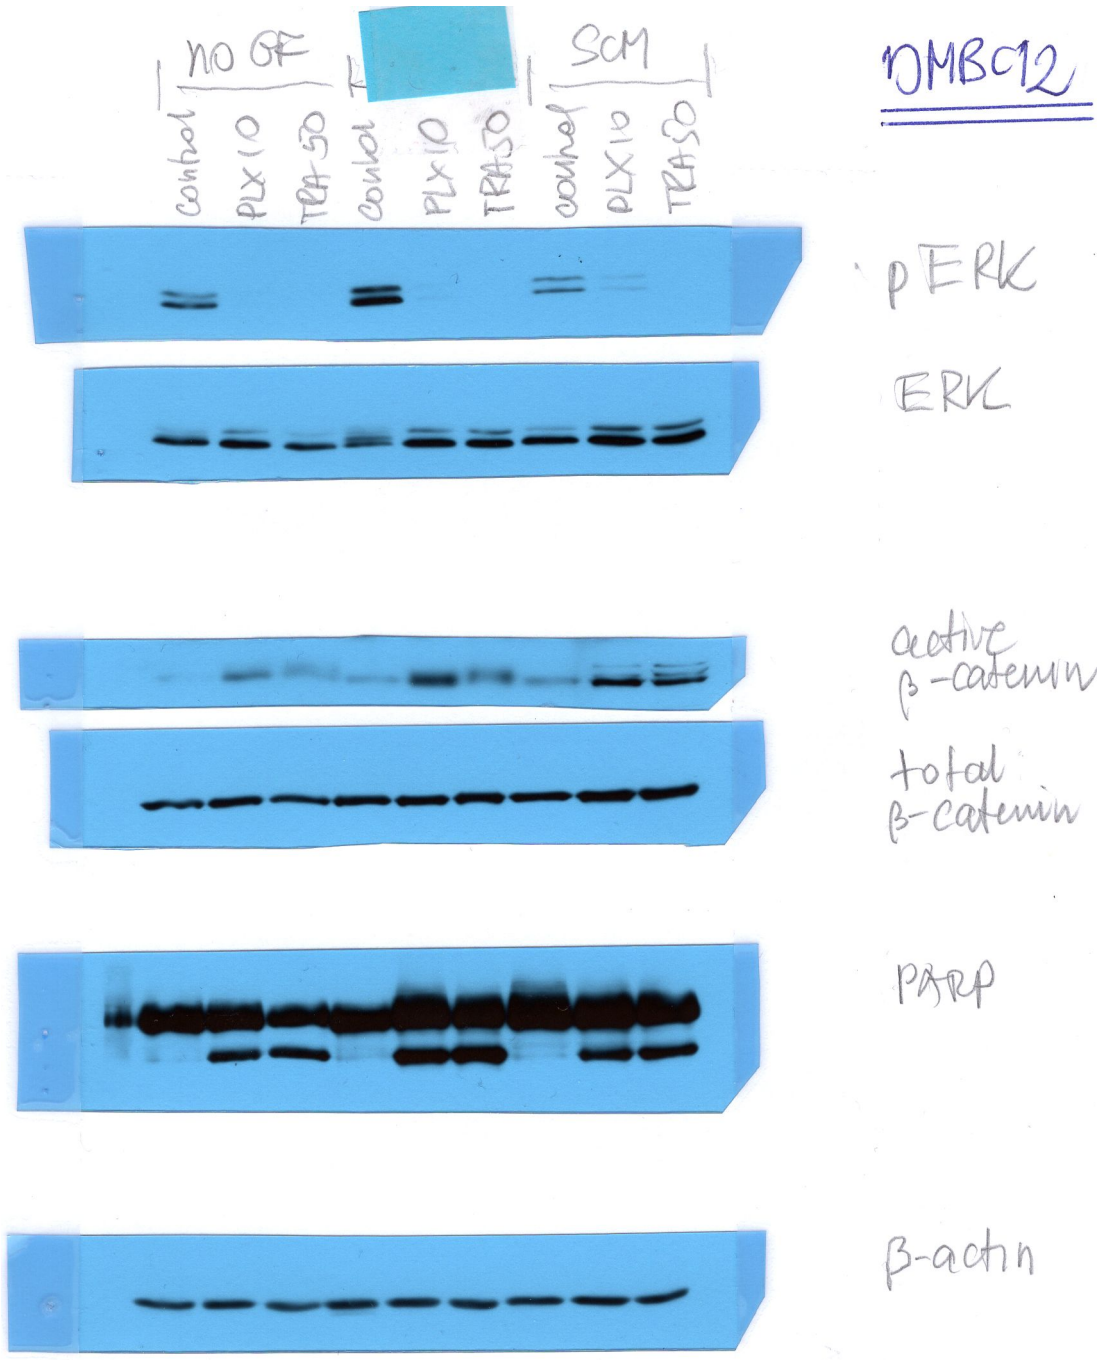

DMBC21

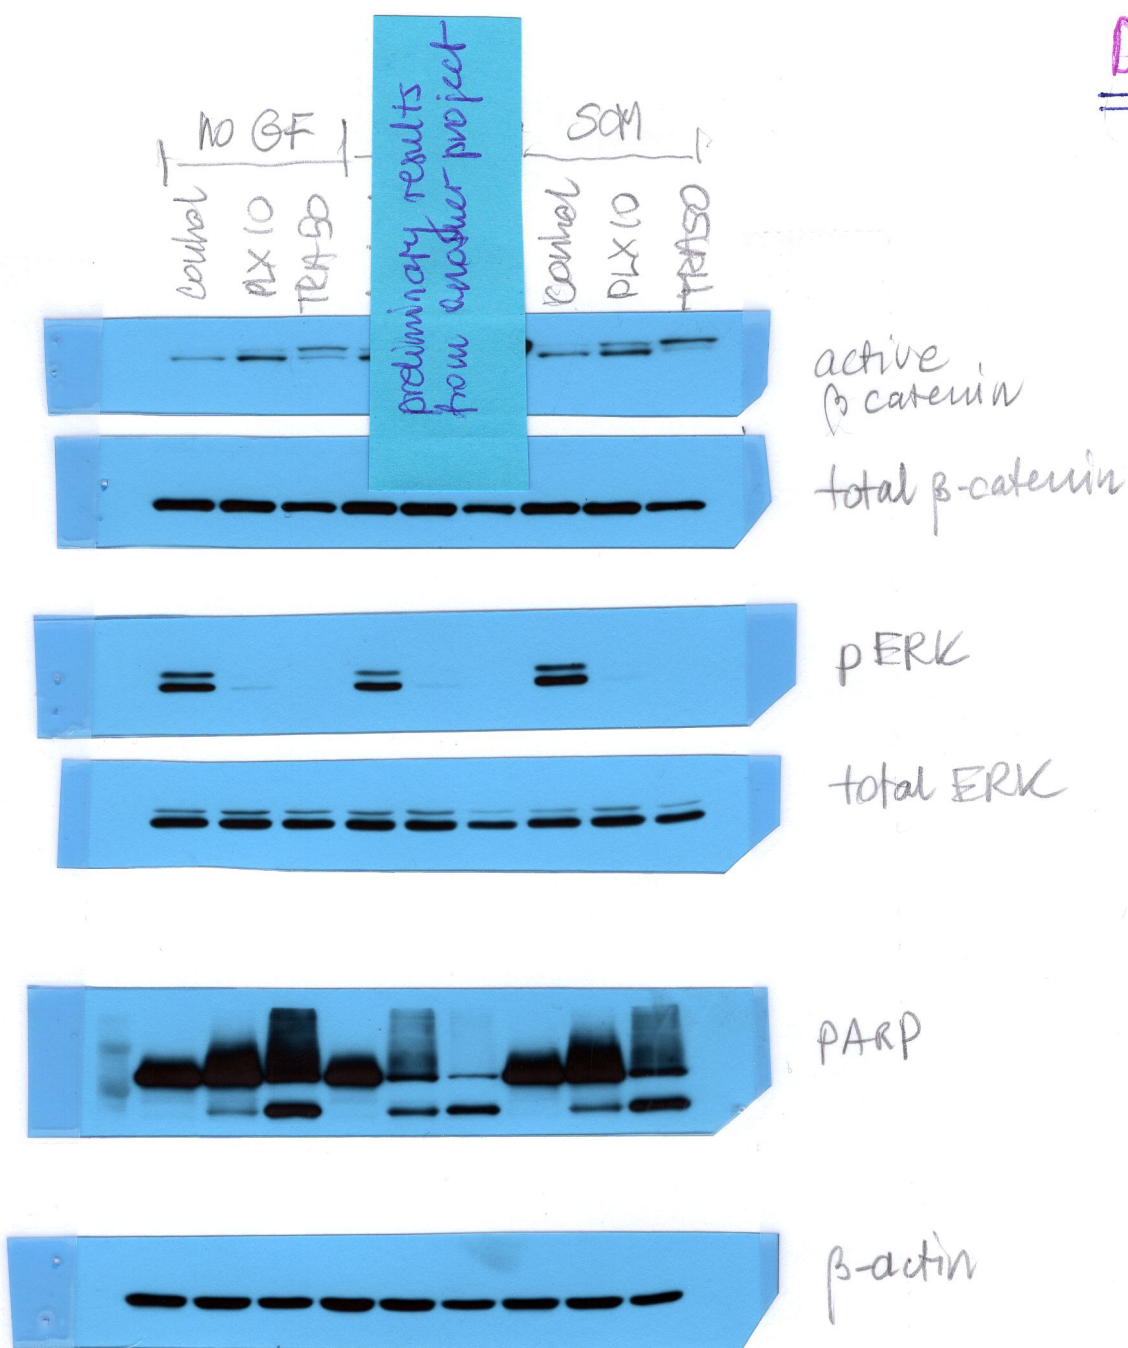

Supplement: pone.0183498.s006.pdf [file pone.0183498.s006.pdf]
